# Supplementary material for: Characterization of trace gas emissions at an intermediate port
Source: Copernicus journal article supplement (doi:10.5194/acp-2017-1153), 2018-01-24

Figure S1. Calculated ship emissions (tonnes of NO<sub>x</sub> and SO<sub>2</sub>) in Halifax Harbour based on AIS ship type and activity from May 2015 to October 2015 (“summer”) and from November 2015 to April 2016 (“winter”).

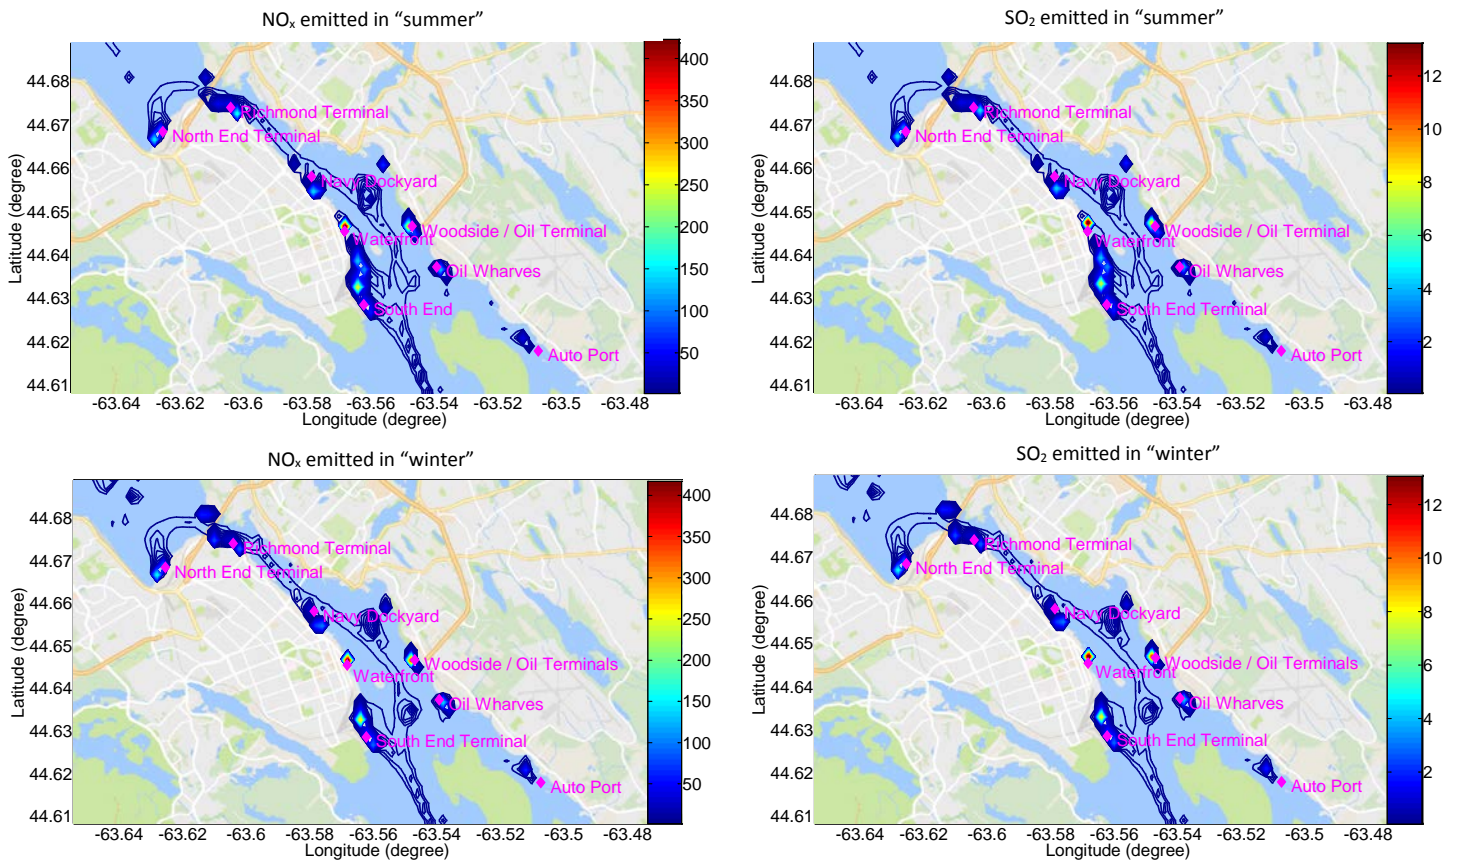

Supplement: Supplementary file 1 [file acp-2017-1153-supplement.pdf]
